# Supplementary material
Source: publisher site journal article supplement (https://static.cambridge.org/content/id/urn:cambridge.org:id:article:S1355617719000572/resource/name/S1355617719000572supp001.doc)
Supplement: Supplementary file 1 [file S1355617719000572supp001.doc]

**SUPPLEMENTAL MATERIAL**

**A: Results of the factor analyses**

A one-factor model provided poor fit, both for the parent-report data (*X*²[405] = 6679.1, *p* <.05; RMSEA = 0.105; CFI = 0.896; TLI = 0.889) and for the child-report data (*X*²[405] = 4038.4, *p* <.05; RMSEA = 0.088; CFI = 0.887; TLI = 0.878). Standardized factor loadings ranged from 0.52 to 0.87 for the parent data, and from 0.49 to 0.81 for the child data. Part of the poor model fit could be attributed to positive local dependencies (i.e. residual correlations >0.20) for parent- and self-report items 17, 18 and 19 (which are similar in wording: ‘Your child has trouble remembering...’) and items 12 and 16 (which both concern word-finding, although different in wording). For these item clusters we found comparable residual correlations across parent and child data. Additionally, a positive local dependency was found for parent-report items 26 and 27 (with no clear similarity in wording or content). Further, in the child data, negative local dependencies (i.e. residual correlations <−0.20) were found for items 16 and 8, and for items 21 and 8; which may be caused by item 8 relating to a general situation in the context of school, whereas item 16 and 21 refer to more concrete behavior that may occur in the context of home. We subsequently re-estimated the one-factor model but now freely estimated the covariance between the item pairs with residuals correlations larger than |0.20| (Edelen & Reeve, 2007). Model fit improved for both the child data (*X*²[401] = 3766.7, *p* <.05; RMSEA = 0.085; CFI = 0.895; TLI = 0.886) and for the parent data (*X*²[401] = 5292.5, *p* <.05; RMSEA = 0.093; CFI = 0.919; TLI = 0.912), but did not provide acceptable model fit. Hence, the local dependencies alone could not explain the poor fit of unidimensional models.

Next, eigenvalue analysis and exploratory bi-factor analyses was used to assess the strength of the first factor. Eigenvalue analysis showed that 47% (parent data) and 53% (child data) of the total variance in item scores was attributable to the first factor. The ratio between the second and first eigenvalue was around 1/7 in both the parent data and child data. We estimated exploratory bi-factor models with 1, 2, and 3 specific factors. For the parent data, in each model, standardized loadings on the common factor were generally at least 0.20 units larger for the common factor than for the specific factors (and most differences were at least 0.50). The exceptions were found for items 1, 18 and 19, which loaded highly (> 0.50) on both a specific factor and the general factor in at least one of the models. We found no support for the ‘memory retrieval’ and ‘attention/concentration’ subscales that were described by Lai et al. (2011). Results provided little support for the ‘working memory’ subscale. In the bi-factor model with three specific factors, the ‘working memory’ items of Lai et al. had relatively large (ranging from 0.21 to 0.44) loadings on the same specific factor. Yet, loadings of these items on the common factor were substantially larger than the loadings on the specific factor. Moreover, these items all inquired functioning at school, which is a plausible alternative explanation for the clustering. For the child data, we found very similar outcomes.

Taken together, the results of the eigenvalue analysis and bi-factor analyses fulfilled our criteria for sufficient unidimensionality; i.e., we found a ratio between the second and first eigenvalue of 1/4 or smaller, and the bi-factor analyses showed that factor loadings on the common factor were substantial (i.e., > .30) and were considerably larger than the factor loadings on specific factors.

References A

Edelen, M. O., & Reeve, B. B. (2007). Applying item response theory (IRT) modeling to questionnaire development, evaluation, and refinement. *Quality of Life Research, 16 Suppl 1*, 5-18. doi:10.1007/s11136-007-9198-0

Lai, J. S., Zelko, F., Butt, Z., Cella, D., Kieran, M. W., Krull, K. R., . . . Goldman, S. (2011). Parent-perceived child cognitive function: results from a sample drawn from the US general population. *Child's Nervous System, 27*(2), 285-293. doi:10.1007/s00381-010-1230-y

**B: Item selection for the short form**

To select items for the short-forms, we first removed items that:

1. in either the parent- or self-report item bank show a significant and meaningful (i.e., an effect of at least 0.03) violation of the GRM assumption of monotone increasing item-step response function, resulting in omission from the GRM (Reeve et al., 2007): *item 20*
2. in either the parent- or self-report item bank show significant and meaningful DIF i.e., McFadden’s pseudo-R2 ≥ 0.02 (Reeve et al., 2007): *item 26*
3. are specifically school-related, to make the questionnaire applicable to all children in the target populations, who will not all be able to attend school (Lai et al., 2014): *items 2, 4, 8, 11, 13, 29*

Next, we selected the best items within each content area, i.e. attention, concentration, executive function, language, spatial orientation, visuospatial ability, memory, personal orientation, and processing speed. This was done to ensure that each content area of the item-bank would be represented in the short-form. The criteria outlined below were used to select items for each content area. These criteria were evaluated in both the parent- and the self-report item bank.

1. Prefer items that:
2. together result in sufficient precision across the entire range of *θ* and maximum precision around the expected clinical range as judged by the IICs (Edelen & Reeve, 2007), i.e. around an estimated *θ* of -1 or lower (Lai et al., 2017).
3. show well behaved ICCs, where maximum probabilities of answer options are distinct and the item yields high information over a broad range of *θ* (Edelen & Reeve, 2007).
4. are unambiguous, not complex, and do not combine multiple statements (Choi & Pak, 2005), to avoid errors and facilitate self-report by children.
5. were selected in CAT simulations in a previous study in a clinical population (Lai et al., 2014), in order to select the most relevant items for clinical populations.
6. Consider removing items that:
7. show item-total correlation < 0.30, suggesting that the item contributes little to the scale (De Vet, Terwee, Mokkink, & Knol, 2011)
8. show residual correlations exceeding |0.20| in the unidimensional CFA model, indicating local dependence (Reeve et al., 2007)
9. show inter-item correlations > 0.70, indicating redundancy (De Vet et al., 2011)
10. show significant misfit to the GRM, as this may negatively affect the accuracy of the estimated model parameters (Reeve et al., 2007)

Applying these criteria resulted in a 10-item short-form including item 10, 12, 14, 15, 17, 21, 22, 23, 24, and 30, see Supplementary table 1. First, items were excluded since they failed to show monotonicity (item 20), showed DIF (item 26) or were school-related (items 2, 4, 8, 11, 13, and 29).

Next, we selected items from each content area, which meant that item 27 was not considered due to it not being a core item for any content area. For the content areas of Processing speed (item 10), Personal orientation (item 17), Spatial orientation (item 23), and Visuospatial abilities (item 30) there was only one core item left. Consequently, the items 10, 17, 23, and 30 were selected for the short form. For the content area Attention (remaining core items 3, 14, 18, 21, 24, 28) the items 14, 21, and 24 were selected, based on their relatively high information value (item 14 and 24) or wide range across which it gathers information (item 21). For the content area Concentration (remaining core items 7, 15, 24, 28), item 15 was selected alongside the already included item 24. Item 7 was not selected, even though it showed a slightly favorable IIC compared with item 15 and was previously selected in a CAT simulation based on clinical data. The reasons for excluding item 7 were that it showed significant model misfit and contained multiple statements in one item (criterion A3). For the content area Executive functioning (remaining core items 15, 22, 25) item 22 was selected, alongside the already included item 15. Item 15 showed the most favorable IIC. Both the IIC and ICC were very similar for items 22 and 25, with the former being more concisely formulated and thus being preferred. For Language (remaining core items 5 and 12), item 12 was selected over item 5, given the superior IIC of item 12, particularly in the lower range of perceived cognitive functioning. For Memory (remaining core items 1, 6, 9, 14, 16, 17, 18, 19, 21), items 14 and 17 had already been selected, representing Attention and Personal orientation respectively. Additionally, item 21 was selected given considerable information value across a wide range of perceived cognitive functioning. The IIC of item 21 was similar to that of item 16, which item was however not preferred due to high residual correlation with item 12. Item 12 was already included in the short form, tapping Language.

References B

Choi, B. C., & Pak, A. W. (2005). A catalog of biases in questionnaires. *Preventing Chronic Disease, 2*(1), A13.

De Vet, H. C., Terwee, C. B., Mokkink, L. B., & Knol, D. L. (2011). *Measurement in medicine: a practical guide*: Cambridge University Press.

Edelen, M. O., & Reeve, B. B. (2007). Applying item response theory (IRT) modeling to questionnaire development, evaluation, and refinement. *Quality of Life Research, 16 Suppl 1*, 5-18. doi:10.1007/s11136-007-9198-0

Lai, J. S., Bregman, C., Zelko, F., Nowinski, C., Cella, D., Beaumont, J. J., & Goldman, S. (2017). Parent-reported cognitive function is associated with leukoencephalopathy in children with brain tumors. *Quality of Life Research, 26*(9), 2541-2550. doi:10.1007/s11136-017-1583-8

Lai, J. S., Zelko, F., Krull, K. R., Cella, D., Nowinski, C., Manley, P. E., & Goldman, S. (2014). Parent-reported cognition of children with cancer and its potential clinical usefulness. *Quality of Life Research, 23*(4), 1049-1058. doi:10.1007/s11136-013-0548-9

Reeve, B. B., Hays, R. D., Bjorner, J. B., Cook, K. F., Crane, P. K., Teresi, J. A., . . . Group, P. C. (2007). Psychometric evaluation and calibration of health-related quality of life item banks: plans for the Patient-Reported Outcomes Measurement Information System (PROMIS). *Medical Care, 45*(5 Suppl 1), S22-31. doi:10.1097/01.mlr.0000250483.85507.04

**C: Supplementary tables**

Supplementary table 1

Items of the Dutch PedsPCF with corresponding content-areas and reasons for selection or removal for short-form

| Item | Content-area | Reason for removal or **selection** |
| --- | --- | --- |
| 1 | Mem | One of lesser functioning Memory items |
| 2 | Attn, Mem | School related item |
| 3 | Attn | One of lesser functioning Attention items |
| 4 | Attn, EF | School related item |
| 5 | Lang | One of lesser functioning Language items |
| 6 | Mem | One of lesser functioning Memory items |
| 7 | Conc | Model misfit & multiple statements in one item |
| 8 | Attn, Conc | School related item |
| 9 | Mem | One of lesser functioning Memory items |
| **10** | PS | **Best Processing speed item** |
| 11 | Attn, Conc | School related itme |
| **12** | Lang | **Best functioning Language item** |
| 13 | PS | School related item |
| **14** | Attn, Mem | **One of best functioning Attention & Memory items** |
| **15** | Conc, EF | **One of best functioning Concentration & EF items** |
| 16 | Mem | High residual correlation with item 12 |
| **17** | Mem, PO | **Only remaining Personal Orientation item (& good Memory item)** |
| 18 | Attn, Mem | One of lesser functioning Attention & Memory items |
| 19 | Mem | One of lesser functioning Memory items |
| 20 | Mem, SO | Violation of monotonicity |
| **21** | Attn, Mem | **One of best functioning Attention & Memory items** |
| **22** | EF | **One of best functioning and concisely formulated Executive functioning items** |
| **23** | SO | **Only remaining Spatial Orientation item** |
| **24** | Attn, Conc | **One of best functioning Attention & Concentration items** |
| 25 | EF | One of lesser functioning Executive Functioning items |
| 26 | Attn | Meaningful Differential Item Functioning by child's gender |
| 27 | - | Not core item for any content area |
| 28 | Attn, Conc | One of lesser Attention & Concentration items |
| 29 | Attn, EF | School related item |
| **30** | VA | **Only remaining Visuospatial abilities item** |

*Notes*. Item numbers printed bold are part of the 10-item short-form.

*Abbreviations*. Attn: attention; Conc: concentration; EF: executive functioning; Lang: language; Mem: memory; PO: personal orientation; PS: processing speed; SO: spatial orientation; VA: visuospatial ability.

*Supplementary table 2
Socio-demographic characteristics of responding versus non-responding families*

|  | Responding | Non-responding | *p* | ES |
| --- | --- | --- | --- | --- |
| *N* | 1441 | 751 |  |  |
| Parent/Caregiver |  |  |  |  |
| Age in years |  |  |  |  |
| M (SD) | 44.6 (5.9) | 44.8 (5.7) | .567 | .034 |
| Range | 26-65 | 22-80 |  |  |
| Female gender, % | 61.4 | 54.1 | **.001** | **.071** |
| Born in the Netherlands, % | 95.8 | 94.4 | .113 | .045 |
| Educational level, % a |  |  | .282 | .042 |
| High | 31.0 | 30.5 |  |  |
| Intermediate | 48.9 | 45.9 |  |  |
| Low | 19.8 | 23.3 |  |  |
| Undisclosed | 0.3 | 0.3 |  |  |
| Paid employment, % | 80.6 | 81.0 | .300 | .033 |
| Undisclosed | 0.4 | 0.9 |  |  |
| Number of children in family, % |  |  | .339 | .031 |
| 1 | 13.5 | 15.7 |  |  |
| 2 | 51.7 | 49.7 |  |  |
| ≥3 | 34.8 | 34.6 |  |  |
| Region of the Netherlands, % |  |  | .640 | .034 |
| Urban West | 13.5 | 13.7 |  |  |
| Remaining West | 28.9 | 31.3 |  |  |
| North | 10.1 | 10.5 |  |  |
| East | 22.9 | 22.5 |  |  |
| South | 24.6 | 22.0 |  |  |
| Child |  |  |  |  |
| Age in years |  |  |  |  |
| M (SD) | 13.0 (3.5) | 13.4 (3.4) | -b |  |
| Range | 7-18 | 7-18 |  |  |
| Female gender, % | 47.3 | 49.7 | .298 | .022 |

*Notes.* Data concern the parent/caregiver and child who were invited to participate.

Characteristics were compared by unpaired *t* tests for continuous variables (age of parent/caregiver and child) and by chi-square tests for categorical variables (all remaining characteristics). Bold printed *p*-values indicate a significant difference. Effect sizes (ES) are Cohen’s *d* for continuous variables and Cramér’s *V* for categorical variables.

Not in all 1441 responding families both the self-report (total *n*=1286) and parent-report (total *n*=1434) were completed, this was only the case in 1174 families. For the purpose of determining a possible selection bias, the characteristics of 1441 families with at least one respondent were compared with 751 families in which neither the parent/caregiver nor the child completed the questionnaire.

a Highest educational level completed of the invited parent. High: higher vocational education, university; Intermediate: middle vocational education, higher secondary education, pre-university education; Low: Primary education, lower vocational education, lower or middle general secondary education.

b Since collection was stratified by age of the child, we did not compare age of the child statistically.

Supplementary table 3

GRM item parameter estimates and fit statistics for the PedsPCF parent-report full item-bank

| Item | a | b1 | b2 | b3 | *S*-*X*2 | *p* |
| --- | --- | --- | --- | --- | --- | --- |
| 1 | 1.48 | -2.06 | -0.19 | 1.74 | 125.99 | 0.33 |
| 2 | 1.45 | -2.55 | -0.64 | 1.22 | 104.79 | 0.40 |
| 3 | 1.43 | -3.50 | -1.25 | 0.78 | 104.12 | 0.28 |
| 4 | 1.90 | -1.53 | -0.31 | 0.89 | 105.36 | 0.71 |
| 5 | 1.50 | -1.80 | -0.30 | 1.27 | 109.61 | 0.10 |
| 6 | 1.99 | -2.29 | -1.33 | -0.28 | 92.57 | 0.34 |
| 7 | 2.78 | -1.45 | -0.47 | 0.64 | 90.21 | 0.53 |
| 8 | 2.56 | -1.61 | -0.47 | 0.76 | 133.49 | 0.01 |
| 9 | 1.97 | -1.96 | -0.60 | 0.81 | 135.06 | 0.04 |
| 10 | 1.54 | -3.05 | -1.93 | -0.53 | 128.05 | 0.04 |
| 11 | 2.61 | -1.32 | -0.20 | 0.88 | 100.27 | 0.25 |
| 12 | 1.58 | -2.62 | -1.10 | 0.36 | 109.81 | 0.45 |
| 13 | 1.84 | -1.57 | -0.58 | 0.50 | 154.76 | 0.03 |
| 14 | 2.24 | -2.09 | -0.59 | 0.88 | 129.63 | 0.02 |
| 15 | 2.52 | -2.07 | -0.90 | 0.48 | 101.12 | 0.23 |
| 16 | 1.48 | -3.52 | -1.73 | 0.06 | 76.01 | 0.96 |
| 17 | 1.24 | -3.36 | -2.05 | -0.45 | 102.29 | 0.53 |
| 18 | 0.97 | -3.88 | -2.11 | 0.08 | 124.42 | 0.13 |
| 19 | 0.96 | -5.24 | -3.59 | -1.32 | 106.70 | 0.11 |
| 20 | - | - | - | - | - | - |
| 21 | 1.49 | -3.60 | -1.50 | 0.42 | 85.43 | 0.76 |
| 22 | 2.07 | -1.53 | -0.31 | 0.96 | 104.62 | 0.56 |
| 23 | 1.01 | -4.56 | -2.25 | -0.08 | 129.83 | 0.15 |
| 24 | 2.16 | -1.78 | -0.59 | 0.56 | 120.52 | 0.13 |
| 25 | 2.14 | -1.40 | -0.11 | 1.11 | 120.28 | 0.14 |
| 26 | 0.95 | -2.73 | -1.73 | -0.18 | 171.08 | 0.14 |
| 27 | 1.75 | -2.73 | -1.63 | -0.28 | 121.95 | 0.09 |
| 28 | 1.96 | -0.96 | -0.17 | 1.28 | 140.33 | 0.03 |
| 29 | 2.04 | -1.80 | -0.86 | 0.18 | 114.06 | 0.42 |
| 30 | 1.14 | -4.47 | -2.88 | -0.84 | 146.92 | 0.002 |

*Note*. A Bonferroni correction for multiple testing was applied, so that *p* = 0.05/29 = 0.0017 was the critical value.

Supplementary table 4

GRM item parameter estimates and fit statistics for the PedsPCF self-report full item-bank

| Item | a | b1 | b2 | b3 | *S*-*X*2 | *p* |
| --- | --- | --- | --- | --- | --- | --- |
| 1 | 1.69 | -2.05 | -0.44 | 1.41 | 115.22 | 0.24 |
| 2 | 1.36 | -2.79 | -1.27 | 0.34 | 126.37 | 0.12 |
| 3 | 1.30 | -2.96 | -1.11 | 0.73 | 100.79 | 0.43 |
| 4 | 1.81 | -1.74 | -0.84 | 0.24 | 113.08 | 0.46 |
| 5 | 1.42 | -1.69 | -0.47 | 1.28 | 108.42 | 0.76 |
| 6 | 1.73 | -2.45 | -1.68 | -0.86 | 88.83 | 0.58 |
| 7 | 2.18 | -1.73 | -0.86 | 0.29 | 161.63 | **<0.001** |
| 8 | 1.99 | -1.73 | -0.85 | 0.31 | 134.79 | 0.02 |
| 9 | 1.79 | -2.01 | -1.00 | 0.30 | 108.81 | 0.46 |
| 10 | 1.54 | -3.01 | -2.03 | -1.00 | 79.14 | 0.78 |
| 11 | 2.04 | -1.44 | -0.53 | 0.81 | 112.26 | 0.23 |
| 12 | 1.49 | -2.54 | -1.14 | 0.30 | 109.98 | 0.44 |
| 13 | 1.72 | -1.65 | -0.97 | 0.06 | 129.82 | 0.23 |
| 14 | 1.79 | -2.46 | -1.10 | 0.54 | 120.51 | 0.06 |
| 15 | 2.12 | -1.95 | -1.06 | 0.26 | 112.17 | 0.13 |
| 16 | 1.47 | -3.00 | -1.50 | 0.10 | 116.36 | 0.09 |
| 17 | 1.03 | -3.05 | -1.85 | -0.32 | 156.97 | 0.07 |
| 18 | 1.02 | -2.58 | -1.57 | 0.30 | 171.86 | 0.04 |
| 19 | 1.20 | -4.44 | -3.26 | -1.91 | 84.51 | 0.05 |
| 20 | 1.32 | -2.08 | -0.88 | 0.96 | 130.53 | 0.29 |
| 21 | 1.49 | -2.59 | -1.34 | 0.44 | 135.62 | 0.02 |
| 22 | 1.74 | -1.80 | -0.85 | 0.44 | 126.26 | 0.20 |
| 23 | 1.27 | -3.52 | -2.18 | -0.75 | 92.23 | 0.60 |
| 24 | 1.83 | -1.86 | -1.05 | 0.12 | 133.34 | 0.05 |
| 25 | 1.86 | -1.47 | -0.57 | 0.69 | 105.74 | 0.61 |
| 26 | 0.92 | -2.57 | -1.80 | -0.05 | 191.28 | 0.01 |
| 27 | 1.73 | -2.66 | -1.62 | 0.00 | 107.92 | 0.15 |
| 28 | 1.85 | -0.89 | -0.09 | 1.42 | 110.20 | 0.25 |
| 29 | 1.56 | -1.98 | -1.20 | -0.08 | 150.97 | 0.06 |
| 30 | 1.38 | -3.47 | -2.25 | -0.66 | 118.92 | 0.04 |

*Note*: A Bonferroni correction for multiple testing was applied, so that *p* = 0.05/30 = 0.0017 was the critical value. Bold printed *p*-values indicate significant misfit.

Supplementary table 5

GRM item parameter estimates and fit statistics for the PedsPCF parent-report short-form

| Item | a | b1 | b2 | b3 | S-X2 | *p* |
| --- | --- | --- | --- | --- | --- | --- |
| 10 | 1.77 | -2.81 | -1.81 | -0.56 | 58.08 | 0.18 |
| 12 | 1.71 | -2.49 | -1.10 | 0.25 | 41.87 | 0.76 |
| 14 | 2.46 | -1.98 | -0.63 | 0.74 | 42.47 | 0.28 |
| 15 | 3.34 | -1.87 | -0.87 | 0.35 | 37.31 | 0.24 |
| 17 | 1.40 | -3.10 | -1.93 | -0.49 | 51.54 | 0.57 |
| 21 | 1.91 | -3.10 | -1.35 | 0.28 | 46.34 | 0.17 |
| 22 | 2.35 | -1.46 | -0.37 | 0.81 | 43.72 | 0.21 |
| 23 | 1.27 | -3.85 | -1.96 | -0.14 | 72.69 | 0.02 |
| 24 | 1.97 | -1.83 | -0.67 | 0.47 | 47.08 | 0.35 |
| 30 | 1.20 | -4.29 | -2.78 | -0.87 | 60.53 | 0.02 |

*Note*. A Bonferroni correction for multiple testing resulted in *p* = 0.05/10 = 0.005 as critical value. None of the items showed significant misfit.

Supplementary table 6

GRM item parameter estimates and fit statistics for the PedsPCF self-report short-form

| Item | a | b1 | b2 | b3 | *S*-*X*2 | *p* |
| --- | --- | --- | --- | --- | --- | --- |
| 7 | 1.74 | -2.71 | -1.84 | -0.89 | 52.23 | 0.19 |
| 9 | 1.61 | -2.35 | -1.06 | 0.30 | 46.15 | 0.47 |
| 10 | 1.68 | -2.46 | -1.07 | 0.57 | 44.99 | 0.35 |
| 12 | 2.52 | -1.74 | -0.93 | 0.26 | 41.19 | 0.33 |
| 14 | 1.16 | -2.75 | -1.66 | -0.26 | 60.78 | 0.28 |
| 15 | 1.75 | -2.30 | -1.18 | 0.42 | 46.97 | 0.31 |
| 17 | 1.76 | -1.72 | -0.79 | 0.47 | 59.31 | 0.03 |
| 21 | 1.54 | -3.03 | -1.89 | -0.63 | 52.75 | 0.23 |
| 22 | 1.59 | -1.93 | -1.07 | 0.16 | 53.96 | 0.23 |
| 23 | 1.63 | -3.04 | -1.98 | -0.57 | 58.72 | 0.03 |
| 24 | 1.74 | -2.71 | -1.84 | -0.89 | 52.23 | 0.19 |
| 30 | 1.61 | -2.35 | -1.06 | 0.30 | 46.15 | 0.47 |

*Note*: A Bonferroni correction for multiple testing was applied, so that *p* = 0.05/10 = 0.005 was the critical value. None of the items showed significant misfit.
